# Supplementary material for: Optical and magnetic properties of the photo-induced state in the coordination network Na2Co4[Fe(CN)6]3.3·14H2O
Source: Royal Society of Chemistry journal article supplement (doi:10.1039/b902833a), 2009-01-01
Supplement: b902833a.pdf [file b902833a.pdf]

## Optical and magnetic properties of the photo-induced state in the coordination network $\text{Na}_2\text{Co}_4[\text{Fe}(\text{CN})_6]_{3.3} \cdot 14\text{H}_2\text{O}$ .

Rémy Le Bris,<sup>a,b</sup> Jean-Daniel Cafun,<sup>c</sup> Corine Mathonière,<sup>a,b,\*</sup> Anne Bleuzen<sup>c</sup> Jean-François Létard.<sup>a,b</sup>

<sup>a</sup> CNRS, UPR 9048, Institut de Chimie de la Matière Condensée de Bordeaux (ICMCB), 87 avenue du Dr. Albert Schweitzer, Pessac, F-33608, France; Fax: (+33) 5 40 00 27 61; Tel: (+33) 5 40 00 26 82; E-mail: [mathon@icmb-bordeaux.cnrs.fr](mailto:mathon@icmb-bordeaux.cnrs.fr)

<sup>b</sup> Université de Bordeaux, UPR 9048, Pessac, F-33608, France

<sup>c</sup> Institut de Chimie Moléculaire et des Matériaux d'Orsay, CNRS UMR8182, Université Paris XI, 91405 Orsay, France

### Supporting information

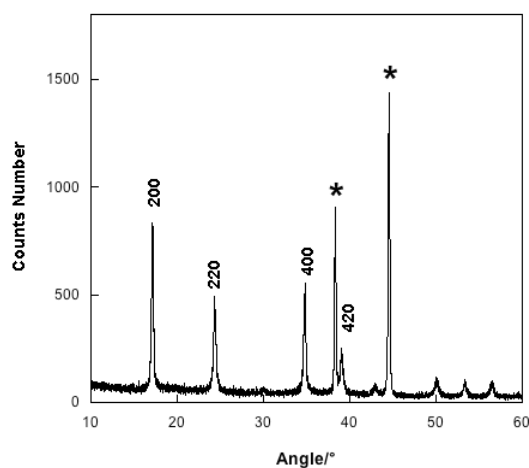

Figure S1: X-ray powder pattern at room temperature for  $\text{Na}_2\text{Co}_4[\text{Fe}(\text{CN})_6]_{3.3} \cdot 14\text{H}_2\text{O}$ .

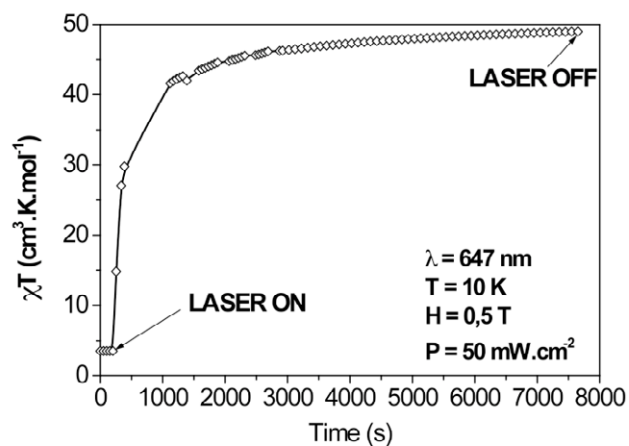

Figure S2:  $\chi T$  vs time at 10 K under a red light at 647 nm ( $50 \text{ mW}/\text{cm}^2$ ) for  $\text{Na}_2\text{Co}_4[\text{Fe}(\text{CN})_6]_{3.3} \cdot 14\text{H}_2\text{O}$

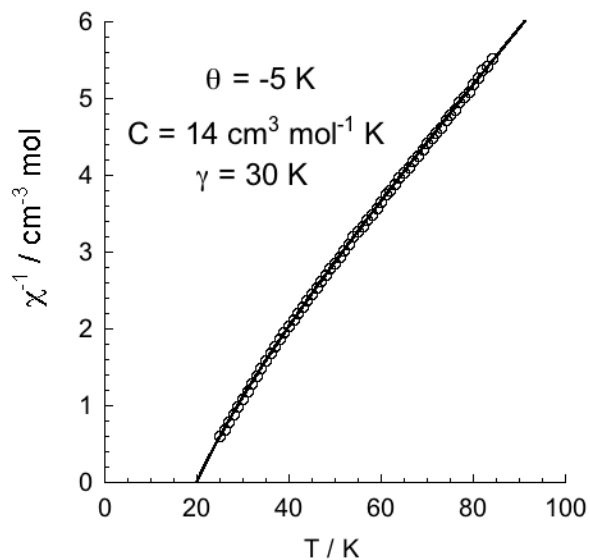

Figure S3:  $1/\chi$  vs  $T$  at 10 K for  $\text{Na}_2\text{Co}_4[\text{Fe}(\text{CN})_6]_{3.3} \cdot 14\text{H}_2\text{O}$  in the PI state. (•) experimental points. (—) fit using the theoretical law for a ferrimagnetic network AB:

The fit parameters are  $\Theta$ , which is the Curie-Weiss constant,  $C$  the Curie constant ( $=C_A+C_B=3.3 \cdot C_{\text{Fe}}+4C_{\text{Co}}$ ),  $\gamma$  being a parameter proportional to the molecular field coefficient  $W$ .<sup>1</sup>

$$\frac{1}{\chi} = \frac{T+\theta}{C} + \frac{\gamma}{T-\theta}$$

The best parameters are given on the figure S3. The  $\Theta$  value is in agreement with the ferrimagnetic nature of the compound.<sup>2</sup>

---

<sup>1</sup> L. Néel, *Ann. Phys.* 1948, t. 3, 10.

<sup>2</sup> O. Sato, Y. Einaga, A. Fujishita, K. Hashimoto, *Inorg. Chem.*, 1999, 38, 4405.
